# Supplementary material for: A molecular specimen bank for contemporary and future study captures landscape-scale biodiversity baselines before Klamath River dam removal
Source: Research Square preprint supplement (doi:10.21203/rs.3.rs-5575262/v1), 2025-04-03
Supplement: Supplementary file 1 [file 432eba53b6a94e3aeab2c2f8.docx]

**Supplementary Information**

A molecular specimen bank for contemporary and future study captures landscape-scale biodiversity baselines before Klamath River dam removal

A molecular specimen bank for contemporary and future study captures landscape-scale biodiversity baselines before Klamath River dam removal

**Authors and Affiliations**

*Dylan J. Keel, Resource Environmental Solutions, LLC. Sacramento, CA, 95818. ORCID: 0009-0006-8445-7033 - [dkeel@res.us](mailto:dkeel@res.us)

Katie Karpenko, Genidaqs Laboratory of Cramer Fish Sciences, West Sacramento, CA, 95691 – [katie.karpenko@fishsciences.net](mailto:katie.karpenko@fishsciences.net)

Scott M. Blankenship, Genidaqs Laboratory of Cramer Fish Sciences, West Sacramento, CA, 95691- [scott.blankenship@fishsciences.net](mailto:scott.blankenship@fishsciences.net)

Gregg Schumer, Genidaqs Laboratory of Cramer Fish Sciences, West Sacramento, CA, 95691 - [greggs@fishsciences.net](mailto:greggs@fishsciences.net)

Oshun O’Rourke, Yurok Tribal Fisheries Department, Klamath, CA, U.S.A., 95548 - [oorourke@yuroktribe.nsn.us](mailto:oorourke@yuroktribe.nsn.us)

Carl O. Ostberg, U.S. Geological Survey, Western Fisheries Research Center, Seattle, WA, 98115. ORCID: 0000-0003-1479-8458 [–costberg@usgs.gov](mailto:–costberg@usgs.gov)

*Daniel A. Chase, Resource Environmental Solutions, LLC. San Francisco, CA, 94111 – [dchase@res.us](mailto:dchase@res.us)

Jeffrey J. Duda, U.S. Geological Survey, Western Fisheries Research Center, Seattle, WA, 98115. ORCID: 0000-0001-7431-8634 – [jduda@usgs.gov](mailto:jduda@usgs.gov)

This PDF file includes:

- Supplemental Material 1 – Statistical Methods
- Supplemental Table 1 – Metabarcoding Species Data
- Supplemental Table 2 – Molecular Library Metadata Requirements

**Supplementary Material 1 – Statistical Methods**

**Model Specification**

We utilized a stochastic partial differential equations approach (SPDE) to introduce Gaussian spatial random field effects, fitted using the integrated nested Laplace approximation (INLA). The INLA method uses a Bayesian framework and is implemented in R software. INLA provides a relatively fast inference by means of analytical approximations of the posterior model and therefore is more expedient for resampling approaches than simulation-based Bayesian approaches such as Markov chain Monte Carlo. The fitted model for species richness followed the form

Where 𝛌*i* is the shape parameter, Y*i* is the number of native fish species per site (richness), 𝛽z is a vector of regression coefficients, *X*z is a vector of variables, and 𝛽0 + *εi* is the intercept to which observations at site *i* belong. The random effect of site, *εi,* has a mean of zero and variance of σ2, and *⍺i*  the spatial random field has *range* and Κ parameters with variance of σ2α. A log link-function was used.

The fitted model for diversity (extreme low diversity sites (Shannon-Wiener diversity index < 0.05) and normal or high diversity sites (Shannon-Wiener diversity index > 0.05)) followed the form:

Where *πi* is the probability of non-low native fish diversity (Shannon Diversity Index < 0.05), Y*i* i is the binary outcome indicating low native fish diversity (0) or non-low native fish diversity (1) per site, 𝛽z is a vector of regression coefficients, *X*z is a vector of variables,and 𝛽0 + *εi* is the intercept to which observations at site *j* belong. The random effect of site, *εi,* has a mean of zero and variance of σ2, and *⍺i*  the spatial random field has *range* and Κ parameters with variance of σ2α. A logit link-function was used.

**Methods for Assessing Spatial Autocorrelation**

Preamble: The purpose of this appendix is to provide additional information on the methods for assessing spatial autocorrelation in the residuals, provide justification for the use of spatial models, and assessing model fit following methods referenced in the main text. The following is the workflow for the species richnesscount GLMMs. For additionalmodel assessment or for additional details regarding analysis see complete published code at: https://github.com/Dylan-Keel/KRRC_Molecular_Library_Temporary

Model Assessment

Following the main text, first a relatively full count model was fit with a Poisson distribution. Using the *dispersion_check* function in R Package: inlatools, we assess overdispersion.


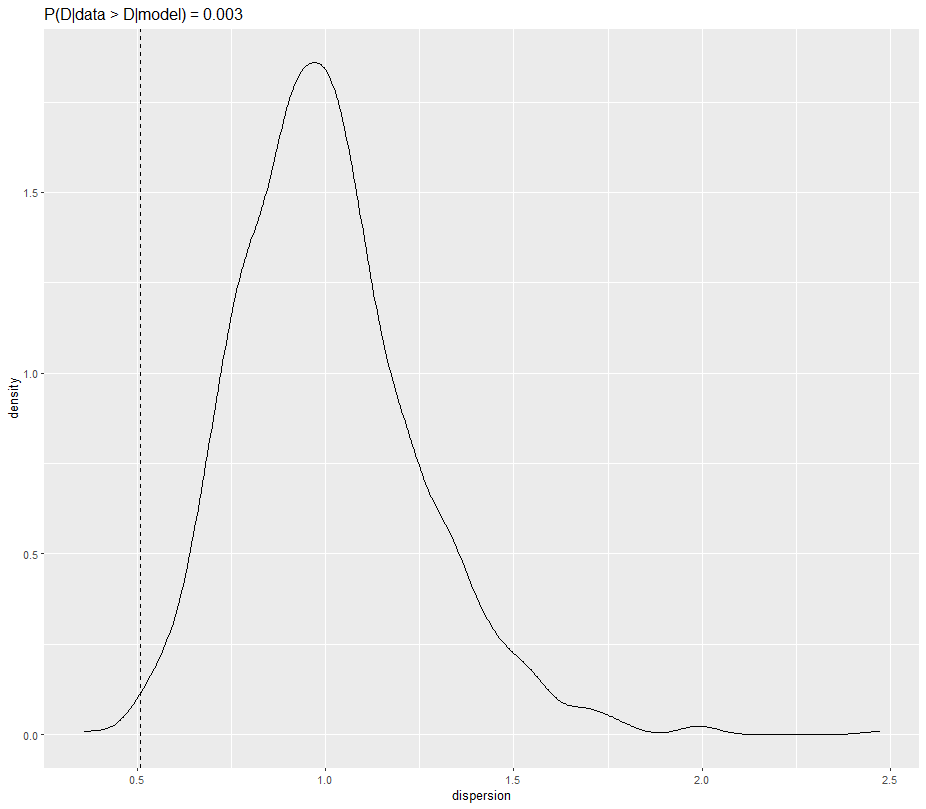


*Figure A1*: Simulated probability density function of overdispersion from 1000 samples from full, non-spatial, Poisson GLMM. Dispersion given the data = 0.510, dispersion given the model = 1.006, and the probability of the overdispersion is taken to be 0.003 or a near certainty that the model is under-dispersed. However, under-dispersion can arise from spatial autocorrelation.


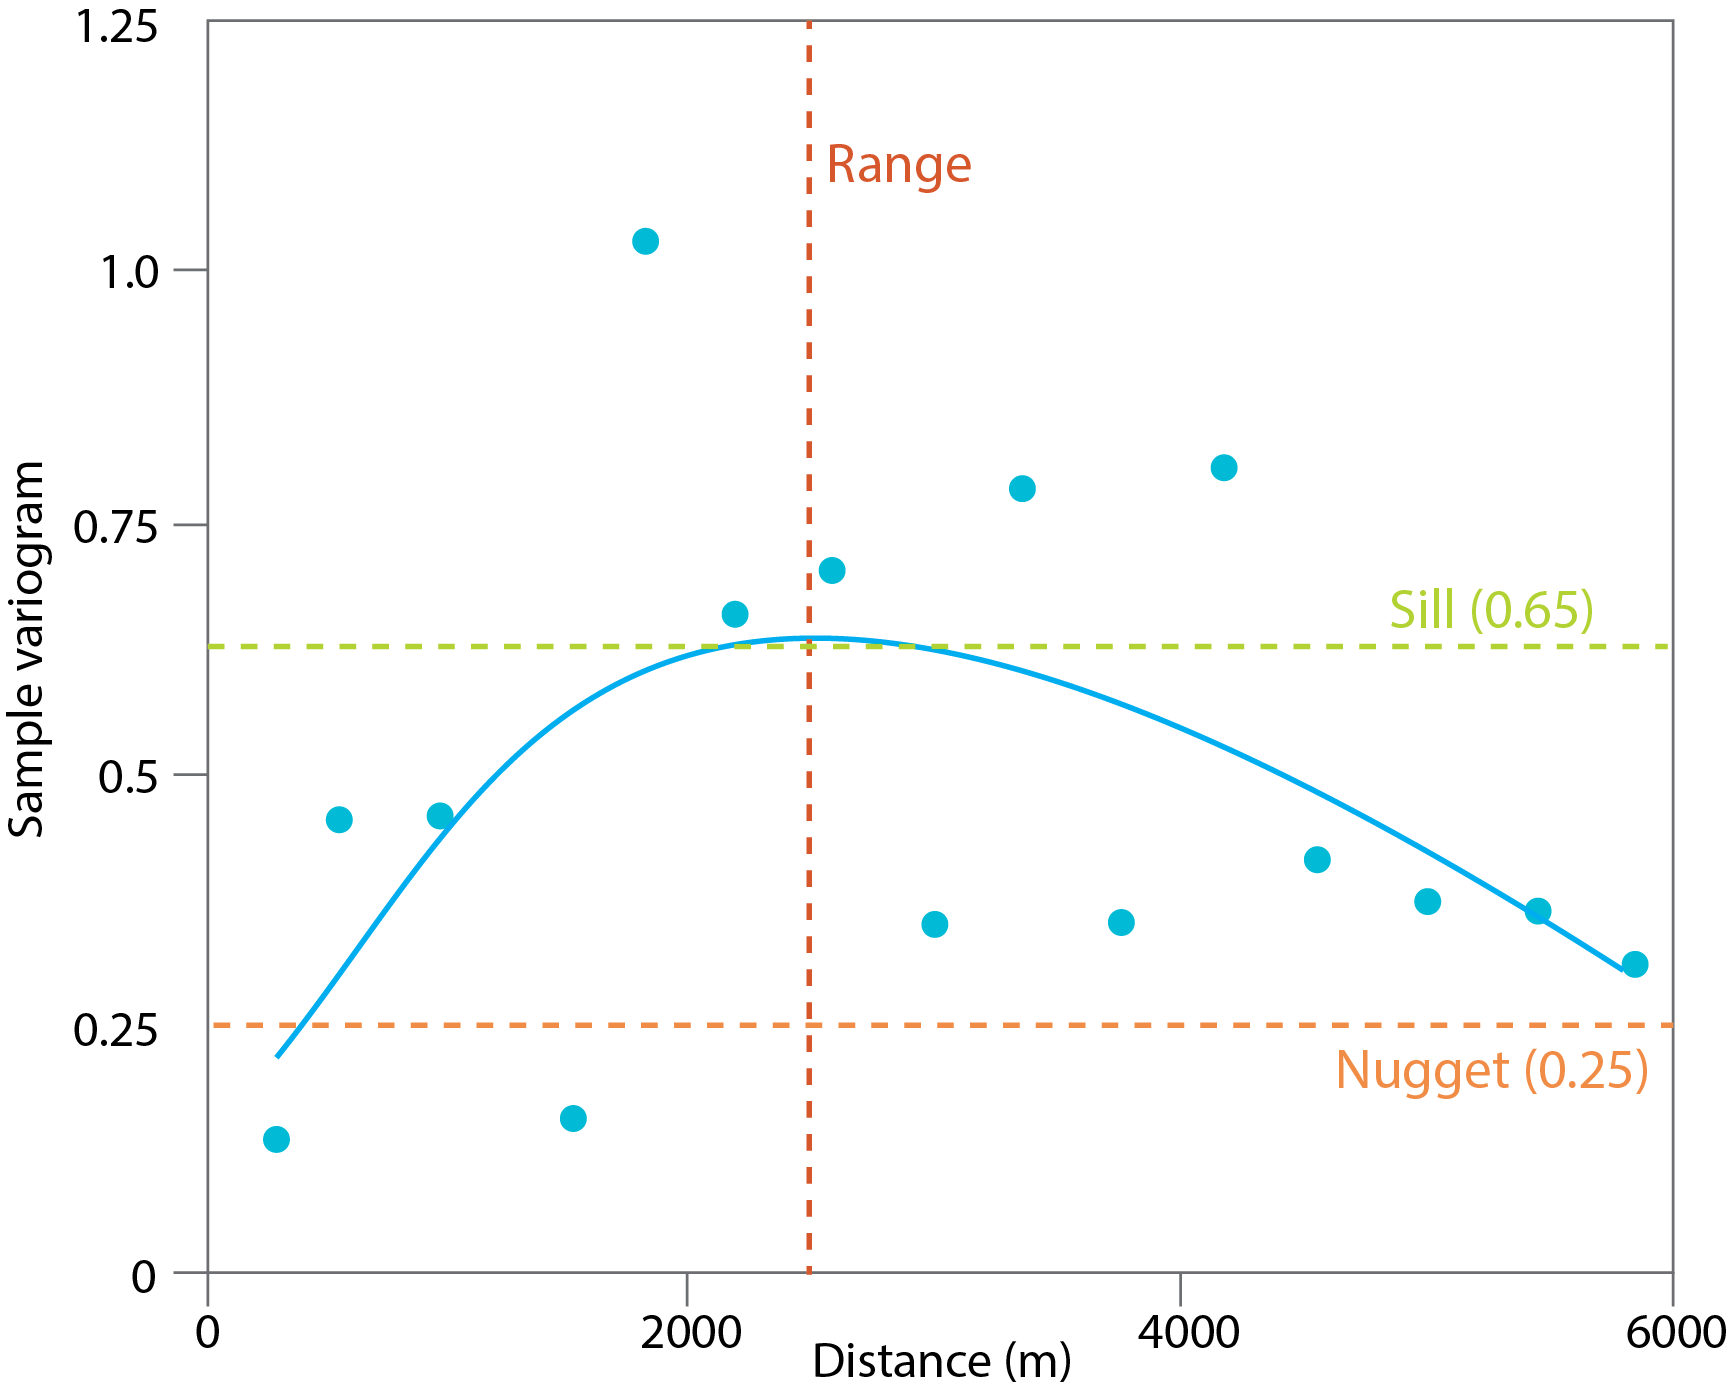


*Figure A2*: Semivariance of the Pearson residuals of a non-spatial Poisson GLMM over distance (m). Sill is estimated at 0.625, nugget is estimated at 0.25, and the estimated range of spatial autocorrelation is 2500 meters. 60% residual variance is spatial.

The semivariogram (*Figure A3*) shows a high degree of spatial autocorrelation in the residuals, indicating that ~60% of the residual variance is spatially structured. *Figure A4* shows another way to view spatial Pearson residuals.


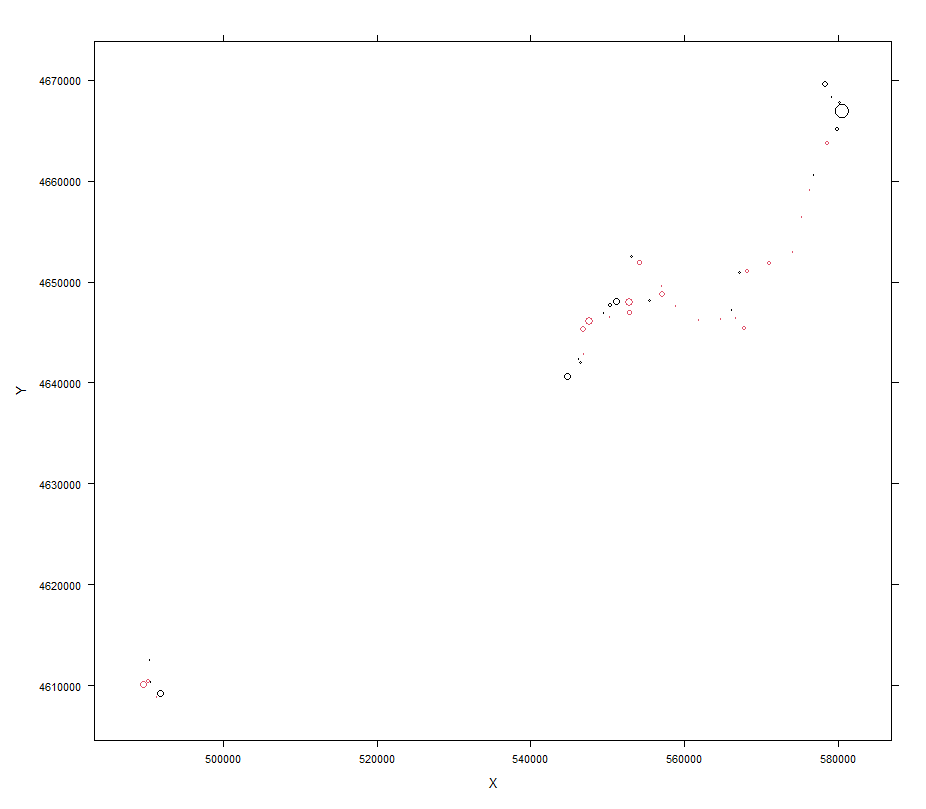


*Figure A3*: Spatial Pearson residuals plotted in pseudo-space. Red (lighter shade) indicates positive residuals, black (darker shade) indicates negative residuals, and size of circle indicates size of residual.

Finding strong evidence of spatial autocorrelation in the residuals spatial models were fit following the text using the estimated range from Fig. 3 as the informative prior mean (mean=2.5 Km, standard deviation = 1 Km). Following model selection, the selected model was assessed for residual spatial autocorrelation as above.


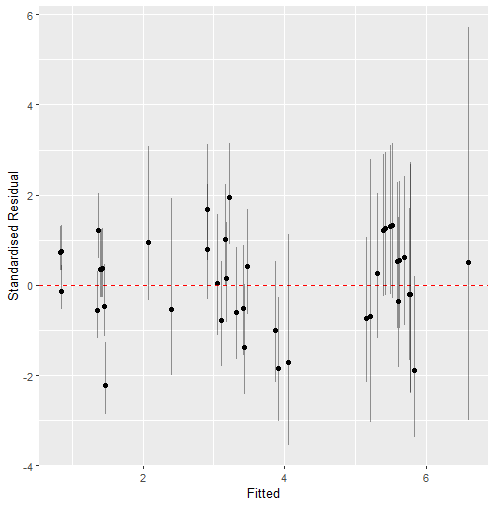


*Figure A4*: Standardized Residuals of selected model vs. fitted values. Residual error structure is compatible with Poisson distributed data.

Model fit was assessed with posterior predictive checks by simulating data to compare with the raw data, the Bayesian p-value (0.45). No evidence of overdispersion or residual spatial autocorrelation, reasonable fit, and standardized-residual structure compatible with model error assumptions suggest that the model is correctly specified and passes goodness of fit.

Model fitting and assessment for the diversity model followed a similar format.

**Supplemental Table 1 – Metabarcoding Species Data:** List of common names of species used in the main text, the exotic/native status of the fishes to the Klamath River and tributaries, and their associated scientific names, as well as other herptiles, birds, and mammals detected.

| **Status** | **Common name** | **Scientific name** |
| --- | --- | --- |
| Exotic Fishes | Black Crappie | *Pomoxis nigromaculatus* |
| Black/Brown Bullhead | *Ameiurus spp.* |
| Bluegill Sunfish | *Lepomis macrochirus* |
| Brown Trout | *Salmo trutta* |
| Carps, Minnows | *Cyprinidae spp.* |
| Goldfish | *Carassius auratus* |
| Fathead Minnow | *Pimephales promelas* |
| Golden Shiner | *Notemigonus crysoleucas* |
| Green Sunfish | *Lepomis cyanellus* |
| Largemouth Bass | *Micropterus salmoides* |
| Pumpkinseed Sunfish | *Lepomis gibbosus* |
| Yellow Bullhead | *Ameiurus natalis* |
| Yellow Perch | *Perca flavescens* |
| Native Fishes | Klamath Large Scale/Klamath Small Scale, Shortnose, Lost River Sucker* | *Catostomidae* |
| Lamprey | *Entosphenus spp.* |
| Rainbow Trout/steelhead | *Oncorhynchus mykiss* |
| Chinook Salmon | *Oncorhynchus tshawytscha* |
| Coho Salmon | *Oncorhynchus kisutch* |
| Sculpin | *Cottus spp.* |
| Speckled Dace | *Rhinichthys osculus* |
| Tui Chub | *Siphateles bicolor* |
| Herptiles | American Bullfrog | *Lithobates catesbeianus* |
| Coastal Giant Salamander | *Dicamptodon tenebrosus* |
| Pacific Giant Salamander | *Dicamptodon sp.* |
| Mole salamanders | *Ambystoma sp.* |
| Pacific Tree Frog | *Pseudacris regilla* |
| Southern Alligator Lizard | *Elgaria multicarinata* |
| Tailed Frog | *Ascaphus sp.* |
| Western fence lizard | *Sceloporus occidentalis* |
| Western Pond Turtle | *Actinemys marmorata* |
| Western Toad | *Anaxyrus boreas* |
| Birds | American Robin | *Turdus migratorius* |
| California Scrub Jay | *Aphelocoma californica* |
| Crows, Ravens | *Corvidae* |
| Double-Crested Cormorant | *Phalacrocorax auritus* |
| Ducks, Geese, Swans | *Anatidae spp.* |
| Mallard | *Anas spp.* |
| New World Sparrows | *Passerellidae* |
| Thrushes | *Turdidae spp.* |
| True Finches | *Passeriformes sp.* |
| White-Winged Scoter | *Melanitta deglandi* |
| Wood Duck | *Aix sponsa* |
| Mammals | American Beaver | Castor canadensis |
| American Black Bear | *Ursus americanus* |
| American Shrew Mole | *Neurotrichus gibbsii* |
| Common Shrew | *Sorex cinereus* |
| Deer | *Odocoileus spp.* |
| Mouse-eared bats | *Myotis spp.* |
| Muskrat | *Ondatra zibethicus* |
| North American River Otter | *Lontra canadensis* |
| Northern broad-footed Mole | *Scapanus latimanus* |
| Pack rat | *Neotoma sp.* |
| Raccoon | *Procyon lotor* |
| Striped Skunk | *Mephitis mephitis* |
| Voles, Muskrats | *Cricetidae* |
| Yuma Bat | *Myotis yumanensis* |

*All species known to be present at time of sampling. Taxonomic identification described in the text.

**Supplementary Table 2:** List and descriptions of metadata associated with the Klamath River Renewal Project Molecular Library sample collections.

| **Section** | **Variable Name** | **Description** |
| --- | --- | --- |
| Site Information | Project.Name | The title of the project under which the samples were collected |
| PI_Contact_Name | Project point of contact. |
| PI_Contact_email | Email address for the project point of contact. |
| Survey.Date.and.Time | Month-day-year and time of sampling. |
| X.Coordinate | Latitude in decimal degrees. |
| Y.Coordinate | Longitude in decimal degrees. |
| Waterbody.Name | The name of the river, stream, or reservoir where sampling occurred. |
| Sub.Site.Locations | Site-level description of where the sample was collected (e.g., Right bank, left bank, center channel). |
| Sample.Depth | A qualitative description of where the water sample was collected (e.g., surface, benthos). |
| Sample Information | Sample.ID | A persistent identifying accession number used to individually track each sample, containing the site name, the sample date, and the replicate number. |
| Replicate.Number | The filter replicate taken at sample date-time and site. |
| Sample.Volume | Water sample volume passed through the filter (mL). |
| Sample.Collection.Method | The method used to collect each sample from the river or stream (e.g., pooled, individual). |
| Filter.Preservation.Method | The methods and reagents used to preserve the filter. |
| Sample.Archive.Location | The current location of the sample archive. |
| Filter.Type | Description of the filter used (e.g., PVDF Sterivex). |
| Filter.Pore.Size | The filter mesh size in microns (e.g., 0.45 µm). |
| Sample Processing | Extraction.Method | The method used to extract nucleic acids from filter. |
| Extraction.Status | Specifies compatibility: DNA extraction, RNA extraction, or not extracted. |
| Location.Storage.Method | Description of how samples are stored for long-term preservation (e.g., frozen at -20°C). |
| Environmental Parameters | Air.Temperature | Measured air temperature at the time of sampling, in degrees Celsius. |
| Water.Temperature | Measured water temperature at the time of sampling, in degrees Celsius. |
| Dissolved.Oxygen | Dissolved oxygen measured during sampling (mg/L) |
| Specific.Conductance | Measured specific conductance during sampling; units are µS/cm (micro-Siemens per centimeter). |
| Analysis Details* | Processing | How the sample was processed or analyzed (e.g., eDNA metabarcoding, archived). |
| Remaining Volume | Remaining volume of NAs for analysis (e.g., DNA/RNA) |
| Processing.Year | The year in which the sample was processed. |
| Processing.Lab.Contact | Information for the processing laboratory (name and email). |
